# Supplementary material for: A defensin-like protein drives cadmium efflux and allocation in rice
Source: PubMed Central journal article supplement (PMC5811569; doi:10.1038/s41467-018-03088-0), 2018-02-13
Supplement: 41467_2018_3088_MOESM1_ESM.pdf [file 41467_2018_3088_MOESM1_ESM.pdf]

# Supplementary information

**Luo et al, A Defensin-like protein drives cadmium efflux and allocation in rice**

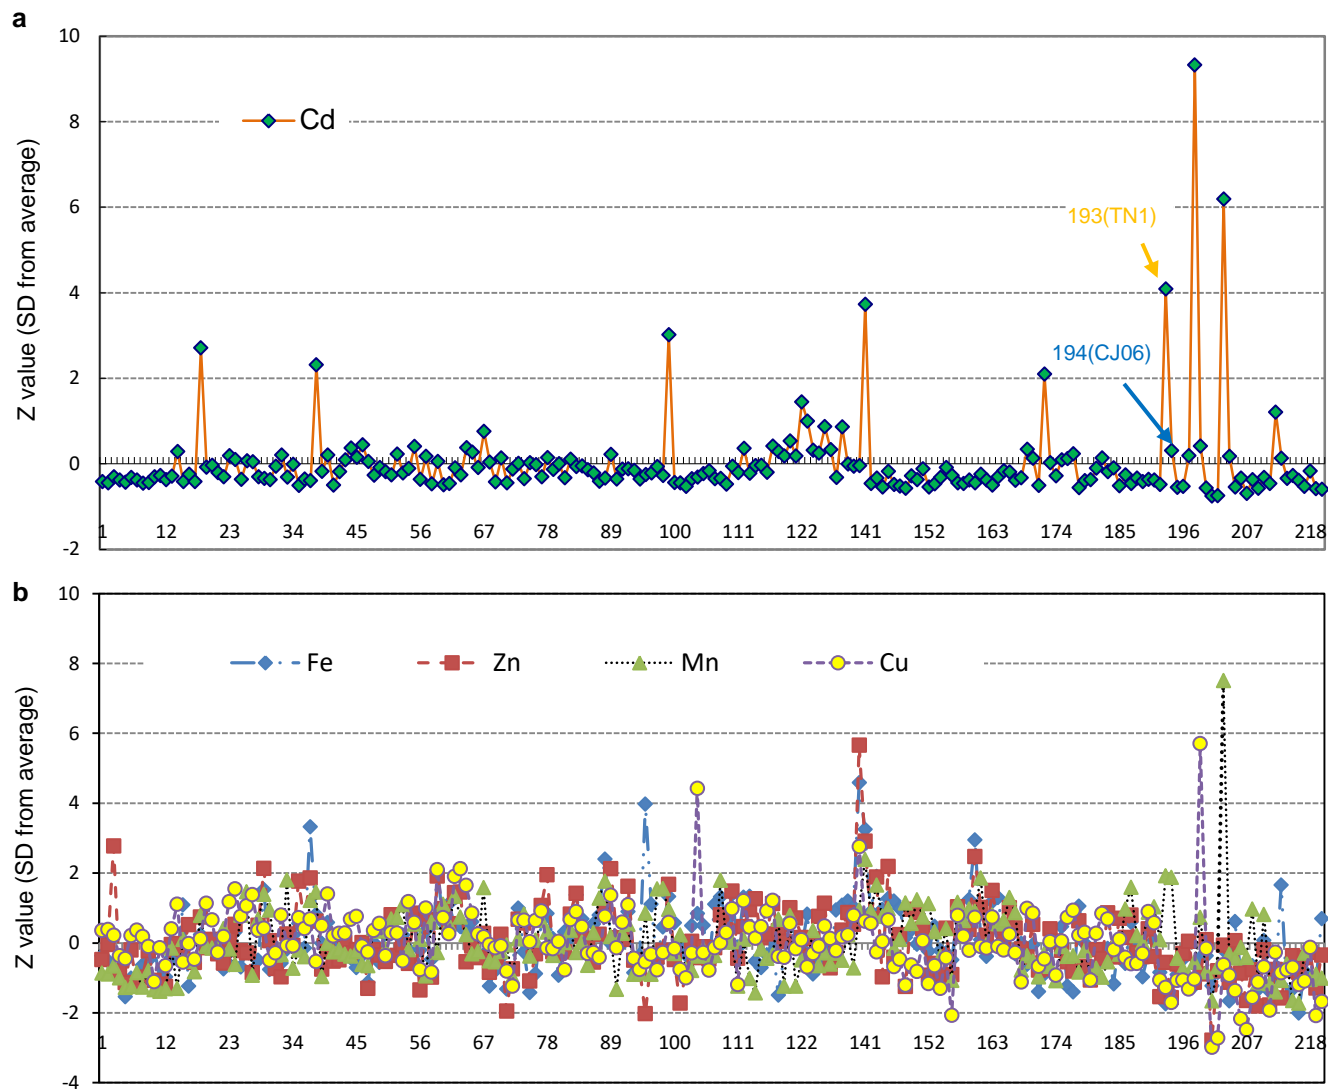

**Supplementary Figure 1. Profiling of Cd (a) and Fe/Zn/Mn/Cu (b) accumulation in grains of 212 rice accessions grown in contaminated paddy field.** Z value (y axis) represents SD from the average value of the whole population [ $Z = (\text{individual value} - \text{population average}) / \text{population SD}$ , Gong et al., 2004, PNAS, 101:15404-]. X axis shows the serial number (refer to Supplementary Table 1 for accession names) designed to each accession. Orange and blue arrows in (a) indicate the rice accessions used for further QTL analysis.

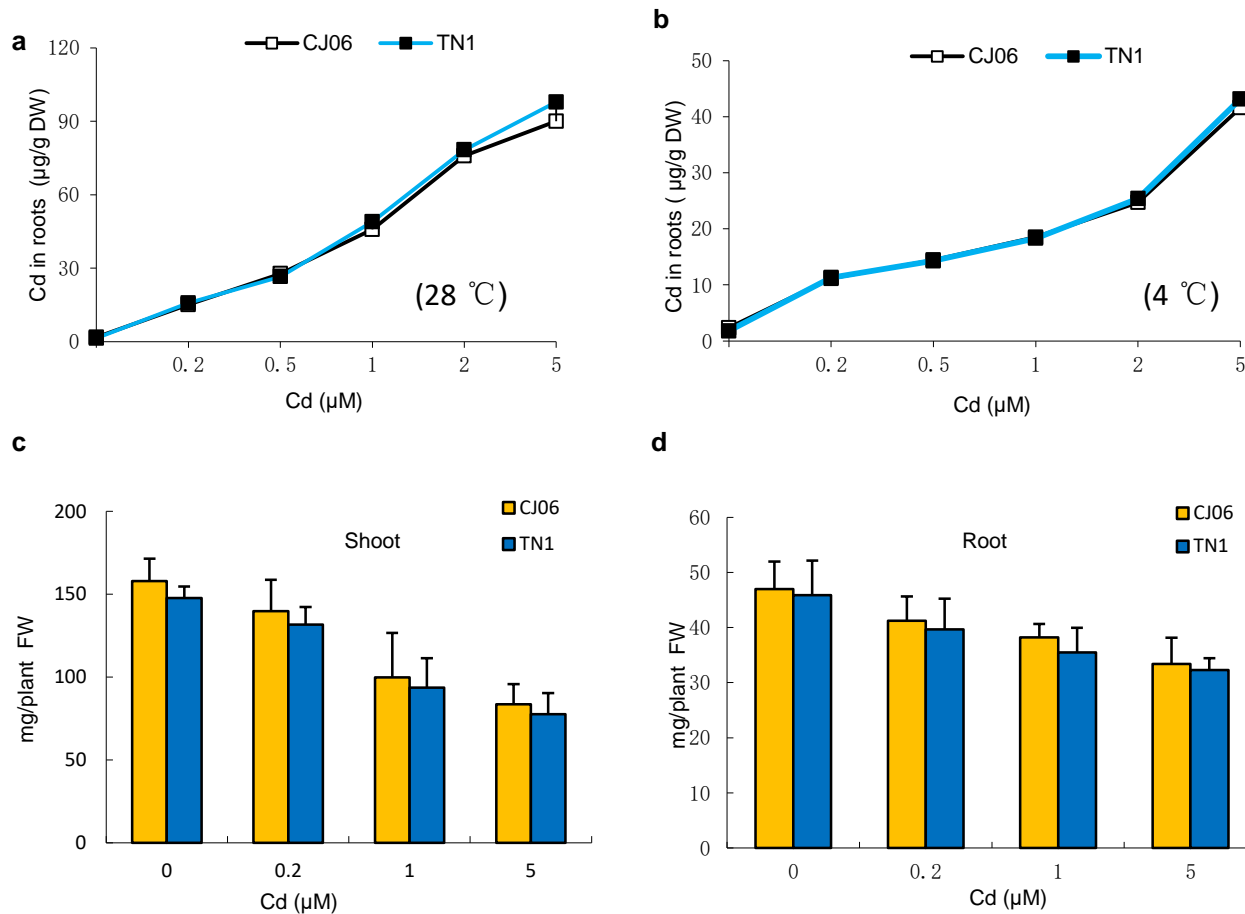

**Supplementary Figure 2. Determination of Cd sensitivity and uptake.** (a-b) Cd uptake assay. Two weeks old seedlings grown in hydroponics were exposed to Cd treatments for 20 minutes, at 28°C (a) or 4°C (b), respectively, and Cd accumulation in roots was determined. (c-d) Cd sensitivity assay. Rice seedlings were grown for 14 days in hydroponics supplemented with Cd at indicated concentrations, and then sampled to determine fresh weights (FW) of shoots (c) or roots (d). Data are mean  $\pm$  SD, n = 4 in (a-d).

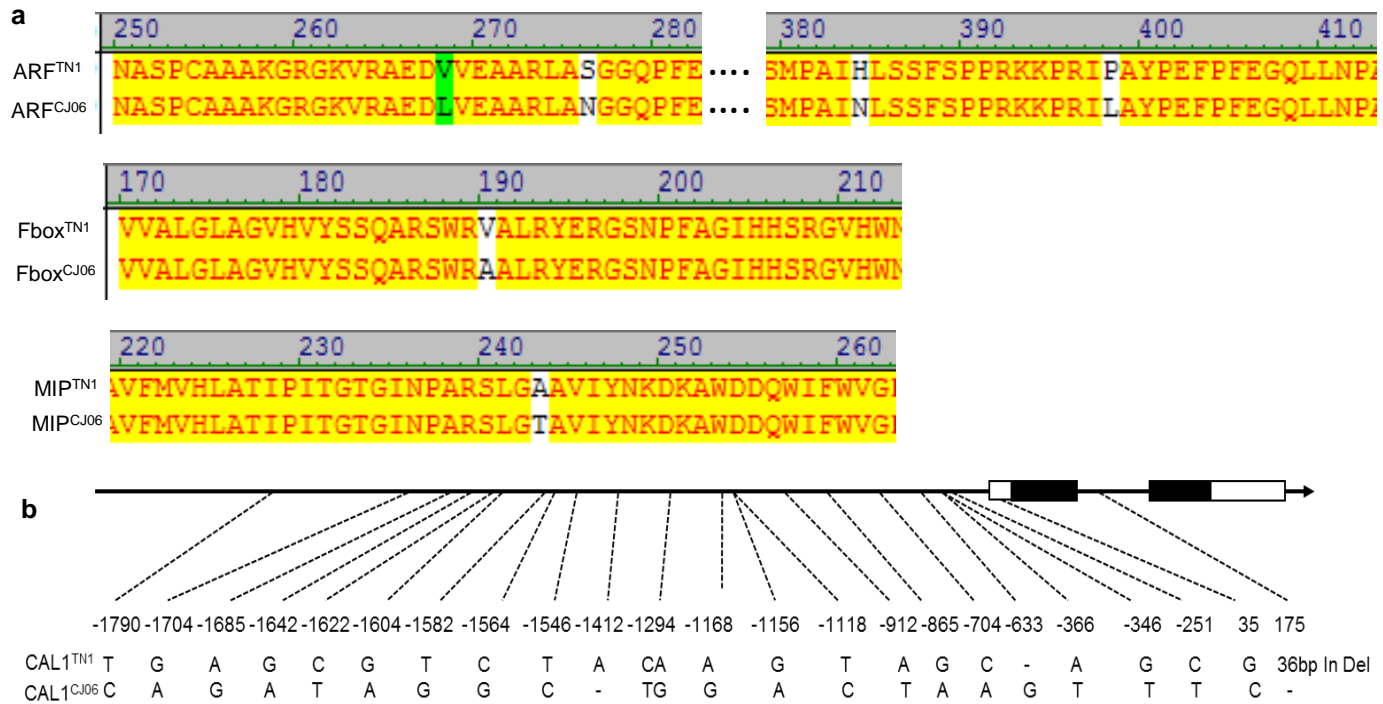

**Supplementary Figure 3. Mapping-based cloning of the casual gene for CAL1**(a) Alignment of protein sequences encoded by candidate genes *ARF* (Os02g0628600), *F-box* (Os02g0630000) and *MIP* (Os02g0629200) from the parental accessions TN1 and CJ06.(b) Natural variations in Os02g0629800 (*CAL1*) between TN1 and CJ06. Open boxes: 5'-UTR or 3'-UTR. Closed boxes: exons. The black line before 5'UTR represents the promoter region.

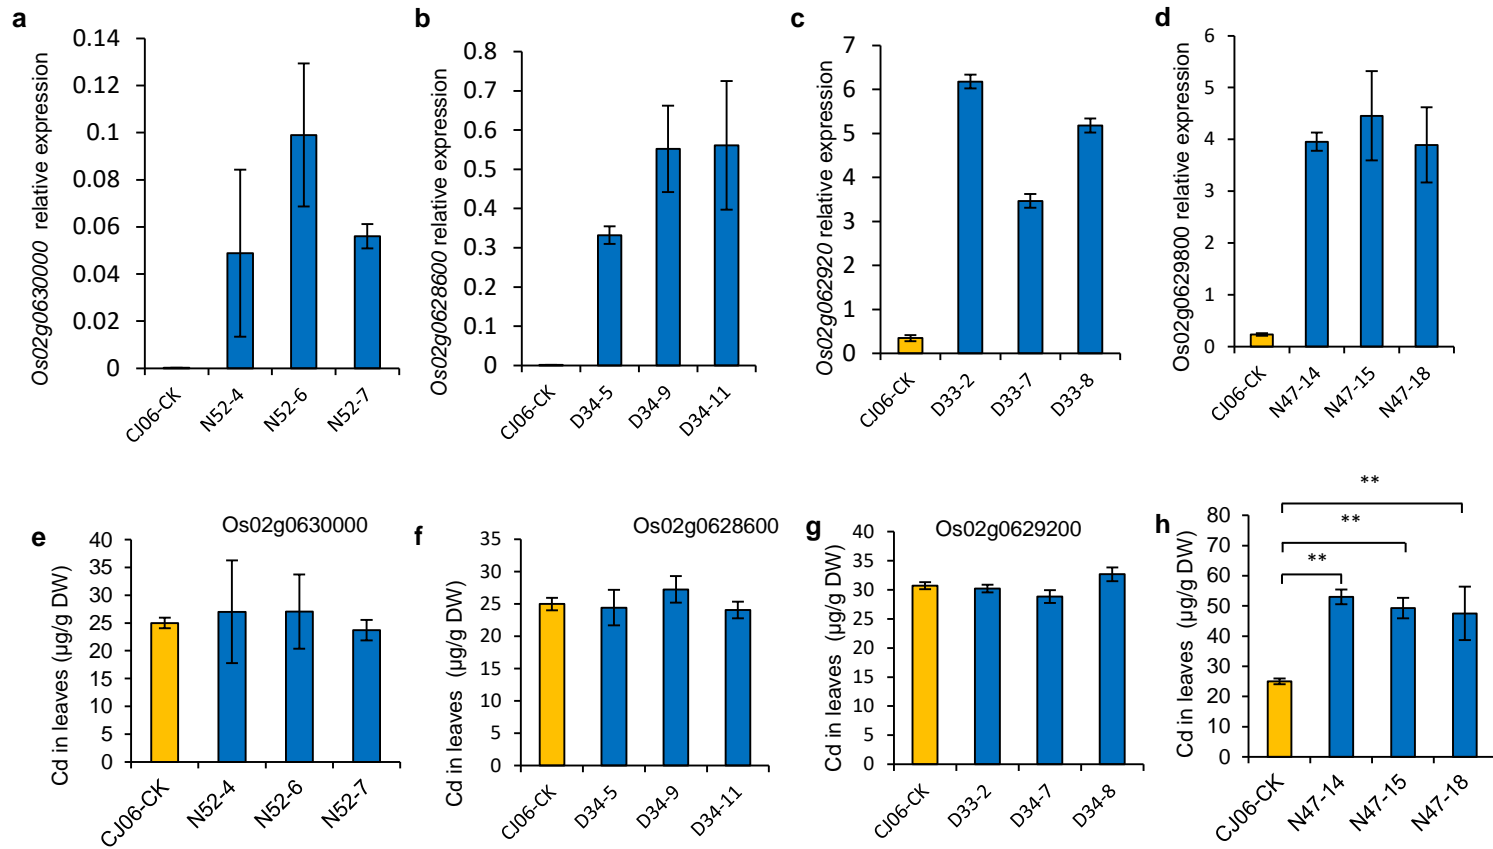

**Supplementary Figure 4. Complementation test of the candidate genes.** Genomic sequence of candidate genes from the over-accumulation accession TN1 were cloned and transformed into the under-accumulation accession CJ06. Transgenic seedlings harboring *Os02g0630000*<sup>TN1</sup>, *Os02g0628600*<sup>TN1</sup>, *Os02g0629200*<sup>TN1</sup> or *Os02g0629800*<sup>TN1</sup> (*CAL1*) were grown in hydroponics to 2 weeks old and then exposed to 10  $\mu\text{M}$  Cd treatment for 7 days. The plants were then sampled to determine expression levels of candidate genes (a, b, c, d) or Cd accumulation in leaves (e, f, g, h). CJ06-CK represents transgenic plants that did not harbor the transformation construct and were used as controls. *Actin* was used as internal controls. Data are mean  $\pm$  SD,  $n = 4$ . Significant differences were determined by Student's *t*-test (\*\* $P < 0.01$ ).

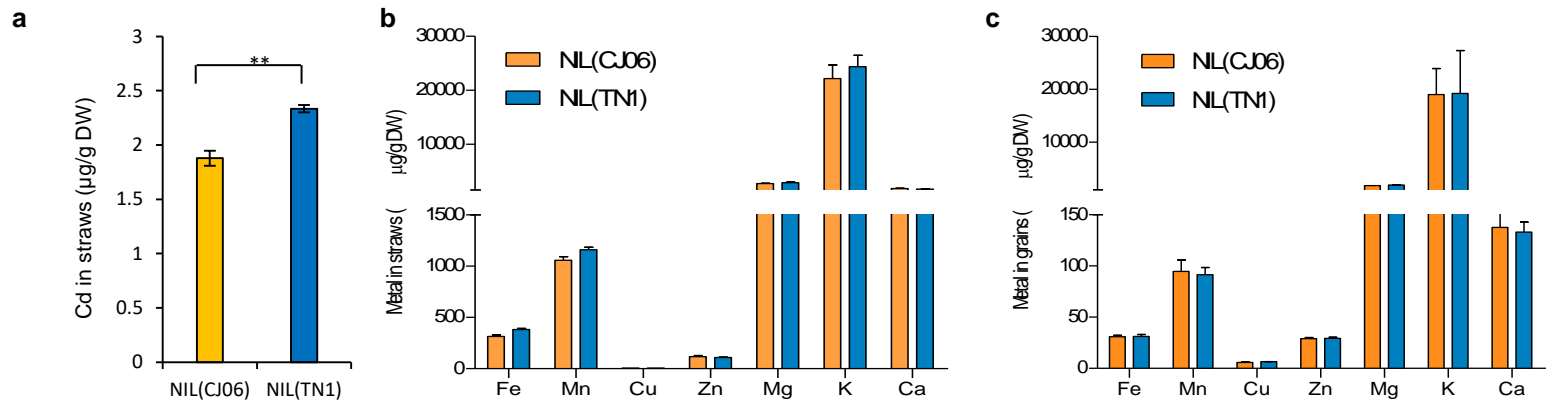

**Supplementary Figure 5. Metal accumulation in rice straws and grains of soil-grown NIL lines.** NIL(TN1) and NIL(CJ06) plants were grown in heavy metal polluted paddy field until ripening. (a) Cd accumulation in straws, (b-c) essential metal (mineral nutrients) accumulation in straws (b) and grains (c). Data are mean  $\pm$  SD, n= 5. Significant differences were determined by Student's *t*-test (\*\**P* < 0.01)

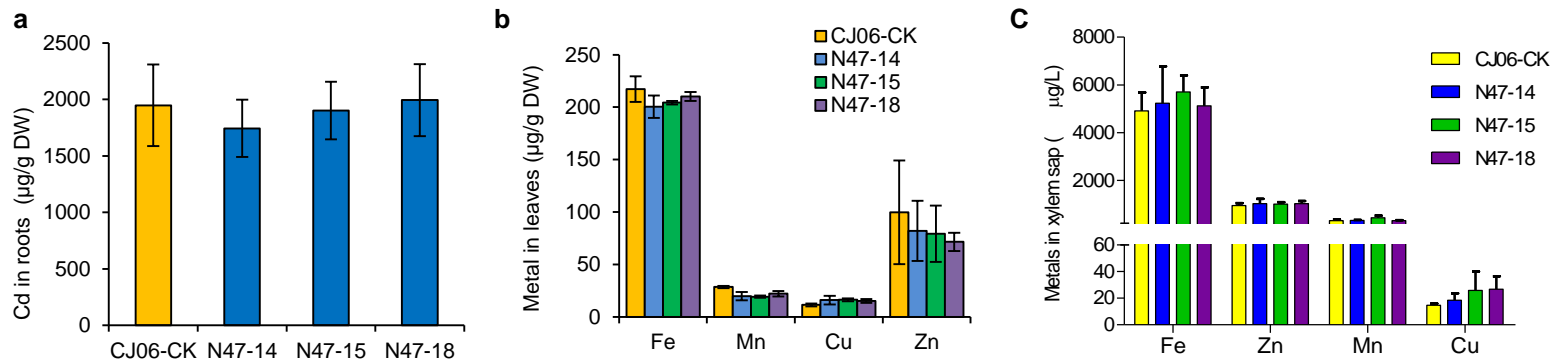

**Supplementary Figure 6. Metal accumulation in the *CAL1* complementation lines.** The identified complementation lines N47-14, N47-15 and N47-18 (Supplementary Figure 3d) were germinated and grown in hydroponics for 2 weeks before treatment with 10µM Cd for 7days. CJ06-CK represent transgene-negative controls. The plants were then sampled to determine Cd accumulation (a) in roots, metals accumulation in leaves (b) and xylem sap (c). Data are mean  $\pm$  SD, n = 4.

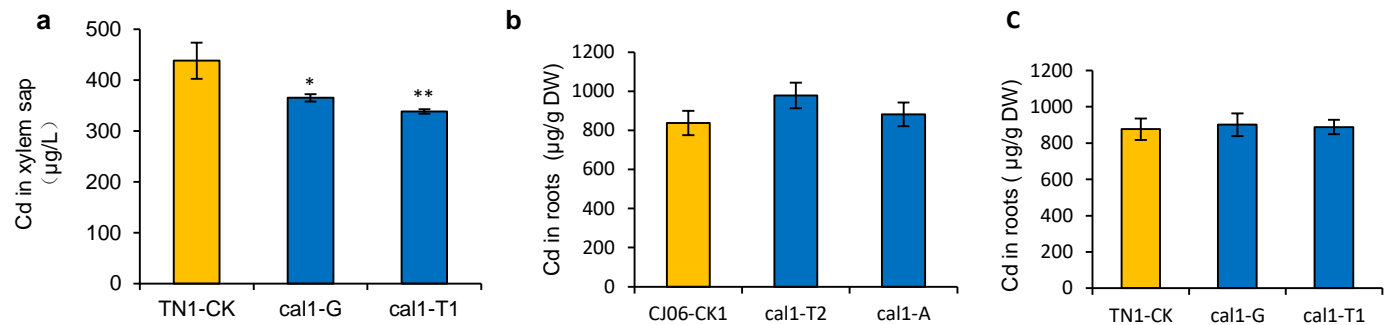

**Supplementary Figure 7. Cd accumulation in *cal1* mutant roots.** (a-c) Two weeks old seedlings grown in hydroponics were exposed to 10 µM Cd for 7days. Cd contents in xylem sap (a) and roots (b, c) of *cal1* mutants were determined. TN1-CK and CJ06-CK1 represent transgene-negative controls. Data are mean  $\pm$  SD, n = 3. Significant differences were determined by Student's t-test (\* $P$  < 0.05, \*\* $P$  < 0.01).



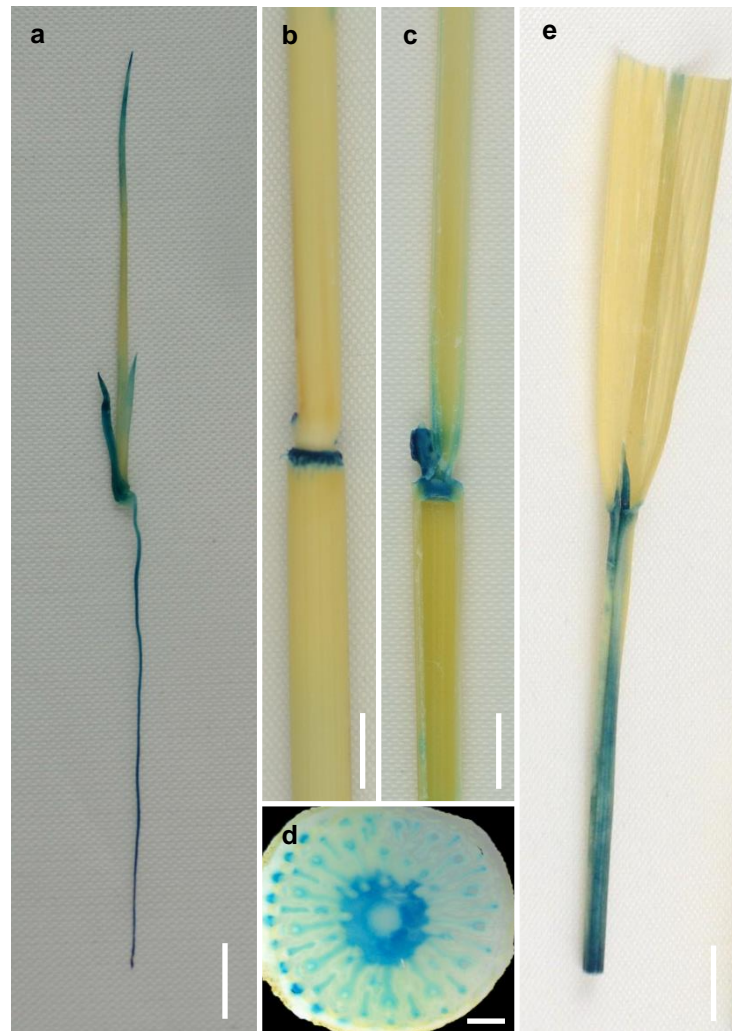

**Supplementary Figure 8. Histochemical localization of GUS activity in transgenic plants expressing the GUS reporter gene under the control of the *proCAL1<sup>TN1</sup>* promoter.** (a) One week old whole-mount seedling. (b, c) Elongated internodes, node I (b) and the longitudinal section of these tissues (c). (d) Cross section of node I at 14 weeks of age. (e) Flag leaf sheath and flag leaf blade. Bars = 1 cm in (a-c, e), 100  $\mu$ m in d.

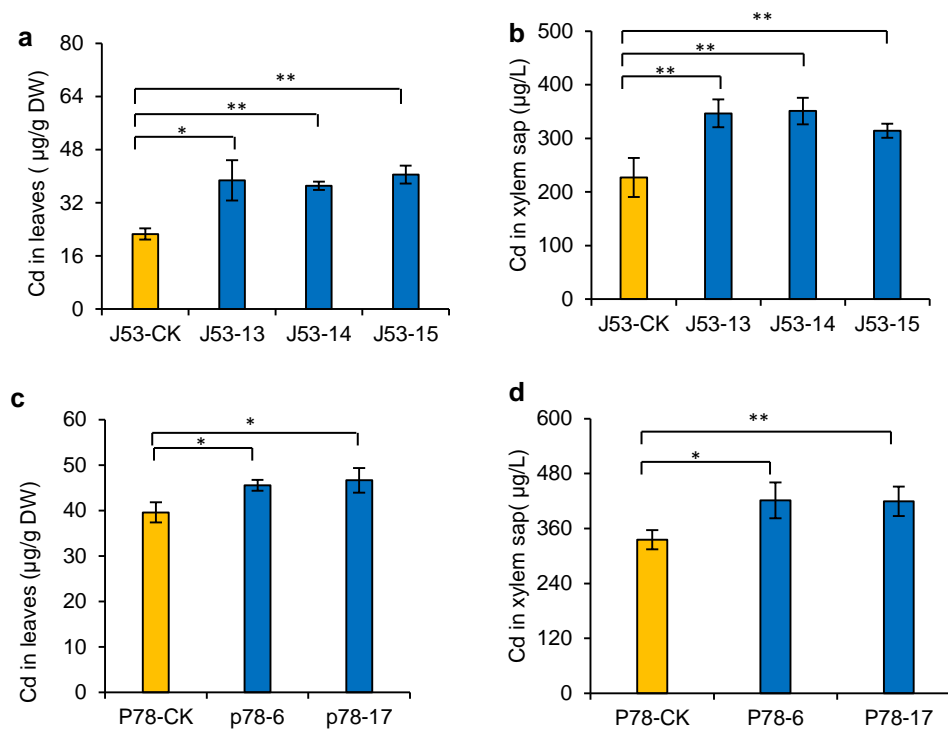

**Supplementary Figure 9. The *CAL1-mRFP* fusion proteins are functional.** Transgenic plants harboring 35S::*CAL1-mRFP* (a, b) or pro*CAL1*<sup>TN1</sup>::*CAL1-mRFP* (c, d) in CJ06 genetic background were grown in hydroponics for two weeks before exposure to 10  $\mu\text{M}$  Cd for 7 days. Cd contents in leaves (a, c) or xylem sap (b, d) were determined. J53-CK represents transgenic plants not harboring the construct 35S::*CAL1-mRFP*. While P78-CK represents plants not harboring the construct pro*CAL1*<sup>TN1</sup>::*CAL1-mRFP*. Data are mean  $\pm$  SD, n = 3. Significant differences were determined by Student's *t*-test (\* $P < 0.05$ , \*\* $P < 0.01$ ).

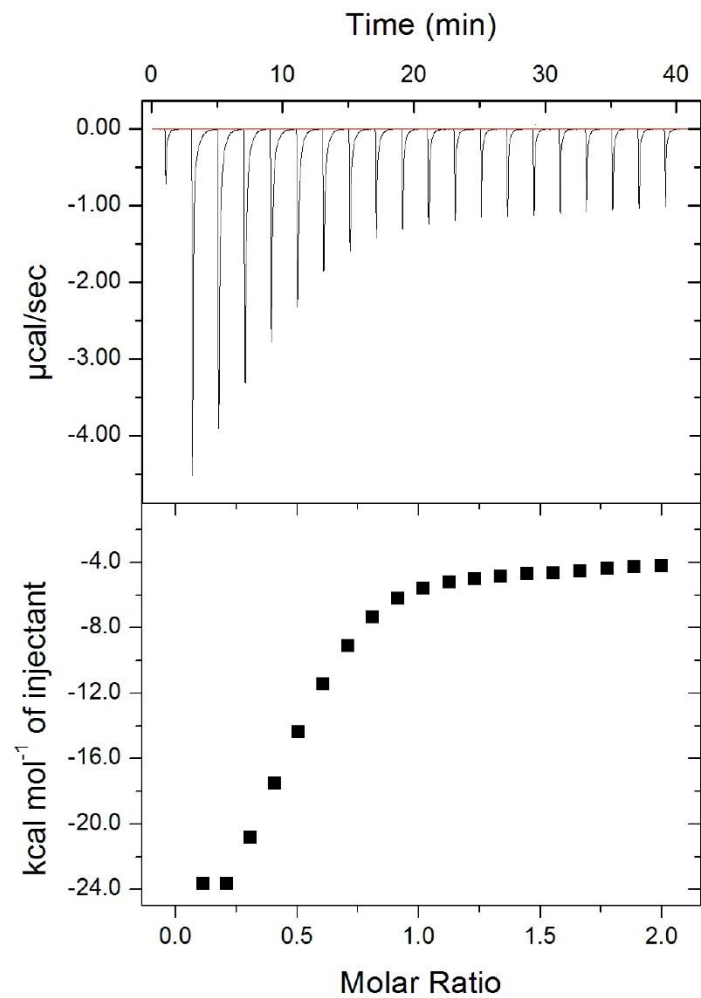

**Supplementary Figure 10.** Determination of  $\Delta$ SPCAL1's binding affinity to Cd using isothermal titration calorimetry at pH 7.5 as described in Method.

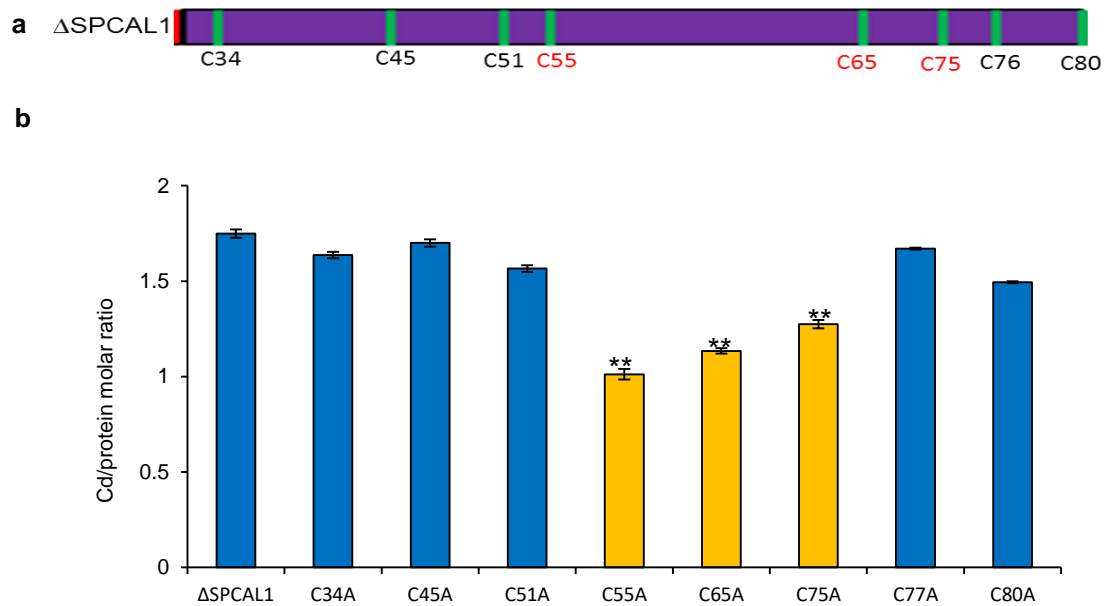

**Supplementary Figure 11. Cd-binding assay for  $\Delta$ SPCAL1 variants derived from site-specific mutagenesis.** (a) Structural model of the  $\Delta$ SPCAL1 protein. Green bars indicate cysteine residues at corresponding sites along protein sequences. (b)  $\Delta$ SPCAL1 variants were isolated and incubated with 100  $\mu$ M Cd at pH 7.5, as described in Method. Data are mean  $\pm$  SD, n= 3. Significant differences were determined by Student's *t*-test (\*\**P* < 0.01).

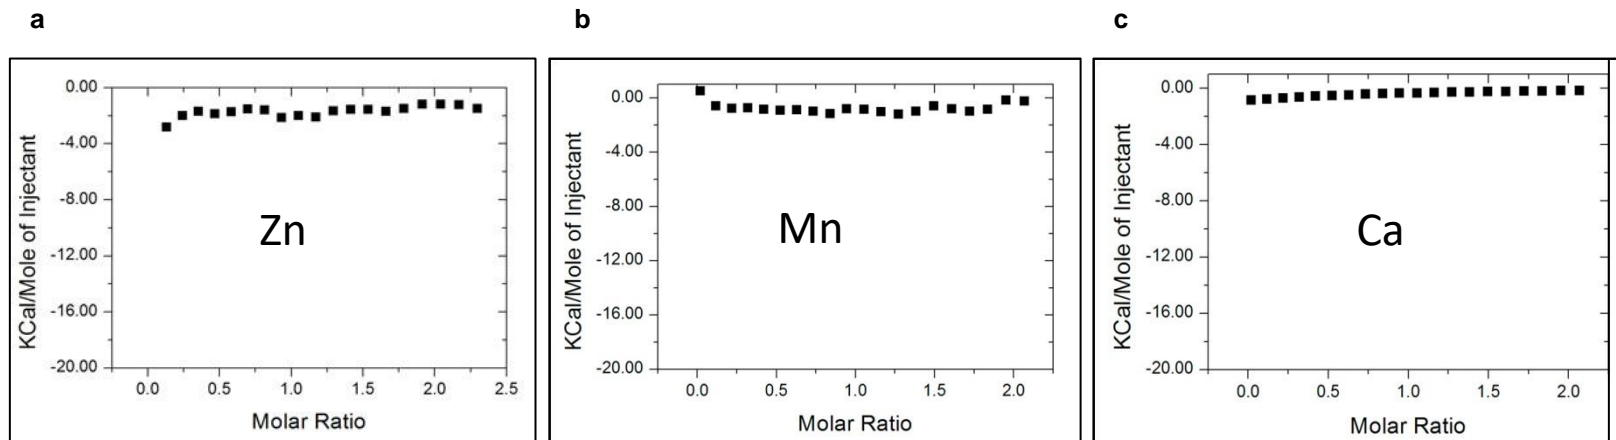

**Supplementary Figure 12. Metal-binding affinity of  $\Delta$ SPCAL1 assayed by isothermal titration calorimetry at pH 7.5.**

(a) Zn-binding affinity of  $\Delta$ SPCAL1. (b) Mn-binding affinity of  $\Delta$ SPCAL1. (c) Ca-binding affinity of  $\Delta$ SPCAL1.

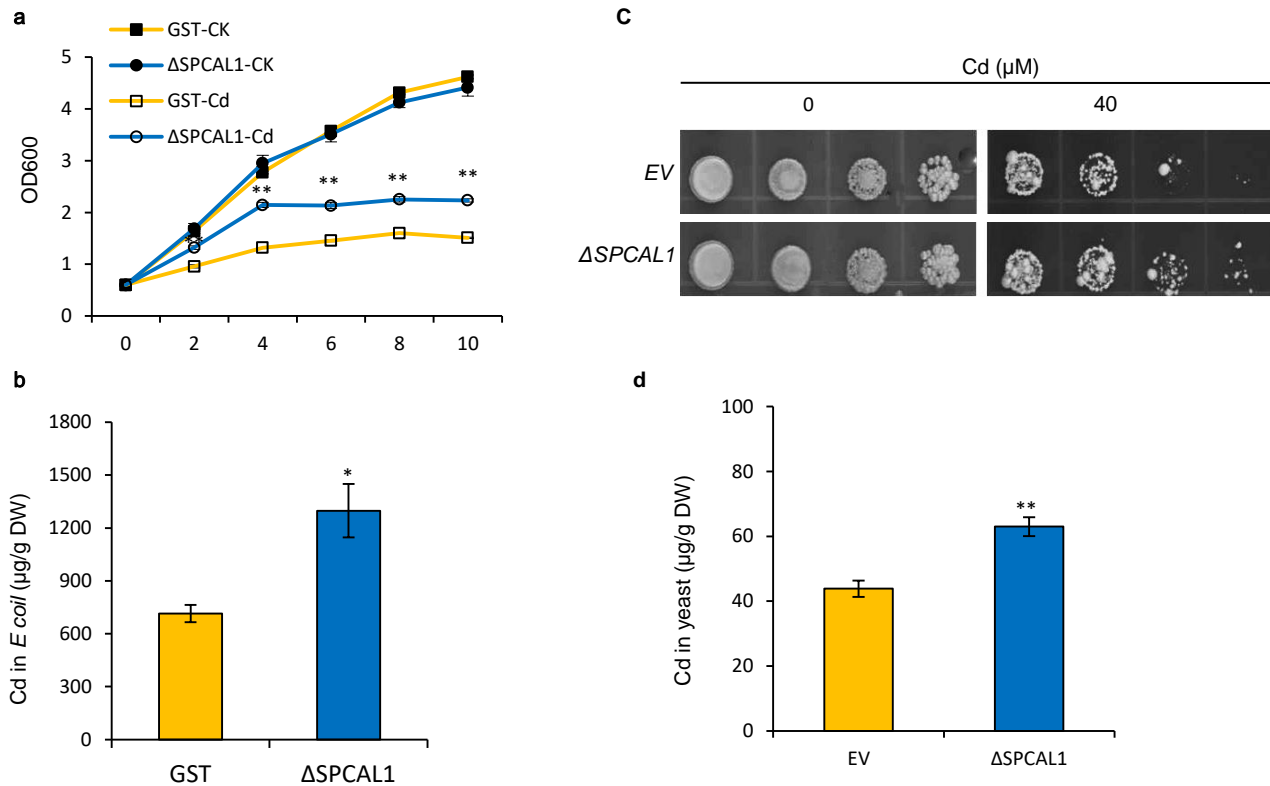

**Supplementary Figure 13. CAL1 enhanced Cd tolerance in *Escherichia coli* and yeast.** (a) Growth curves for *Escherichia coli* strains expressing  $\Delta$ SPCAL1. Blue lines indicate GST- $\Delta$ SPCAL1 fusion in which the secretion signal peptide of CAL1 was deleted to simulate mature protein. Yellow lines indicate the GST control. Close box and circle represent control condition without Cd (CK); Open box and circle represent treatment with 200  $\mu$ M Cd (Cd). (b) Cd concentration in *Escherichia coli* strains from (a) incubated for 4 hours was determined by ICP-MS. (c)  $\Delta yap1$ , a Cd-sensitive yeast mutant in which activation of *YCF1* expression was impaired, was transformed with the blank vector (EV) or  $\Delta$ SPCAL1. The transformants were plated and grown in the presence of 0 or 40  $\mu$ M Cd at 30°C for 7 days before imaging. Galactose was added to activate gene expression. (d) Yeast strains from (c) were incubated with 20  $\mu$ M Cd in SD medium for 2 hours. Cd concentrations in the harvested cells were determined by ICP-MS. Data are mean  $\pm$  SD, n = 3 in (a, b, d). Significant differences were determined by Student's *t*-test (\*\**P* < 0.01).

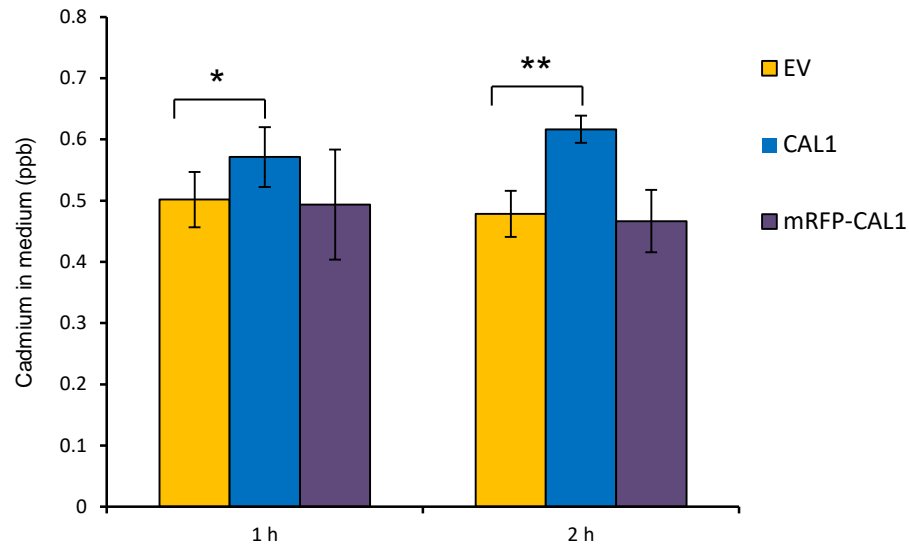

**Supplementary Figure 14. Cd extrusion enhanced in yeast expressing CAL1.** Yeast transformants were grown to OD600 of 1.0 and treated with 20  $\mu\text{M}$  Cd for 2 hours. Cells were collected and washed twice with ultrapure ( $>18 \text{ M}\Omega \text{ cm}^{-1}$ ) water, 25 mM  $\text{CaCl}_2$  (pH 5.0) and ultrapure water again in succession. The washed cells were resuspended in fresh liquid SD medium to OD600 of 1.5, then incubated for 1 or 2 hours before removal of cells by centrifuge (12000 RPM for 2 min). Cd content in the collected supernatant was determined by ICP-MS. EV, empty vector, CAL1 and mRFP-CAL1 represent the full length or non-secreted form of CAL1 protein, respectively. Data are mean  $\pm$  SD,  $n = 8$ . Significant differences were determined by Student's  $t$ -test (\* $P < 0.05$ , \*\* $P < 0.01$ ).

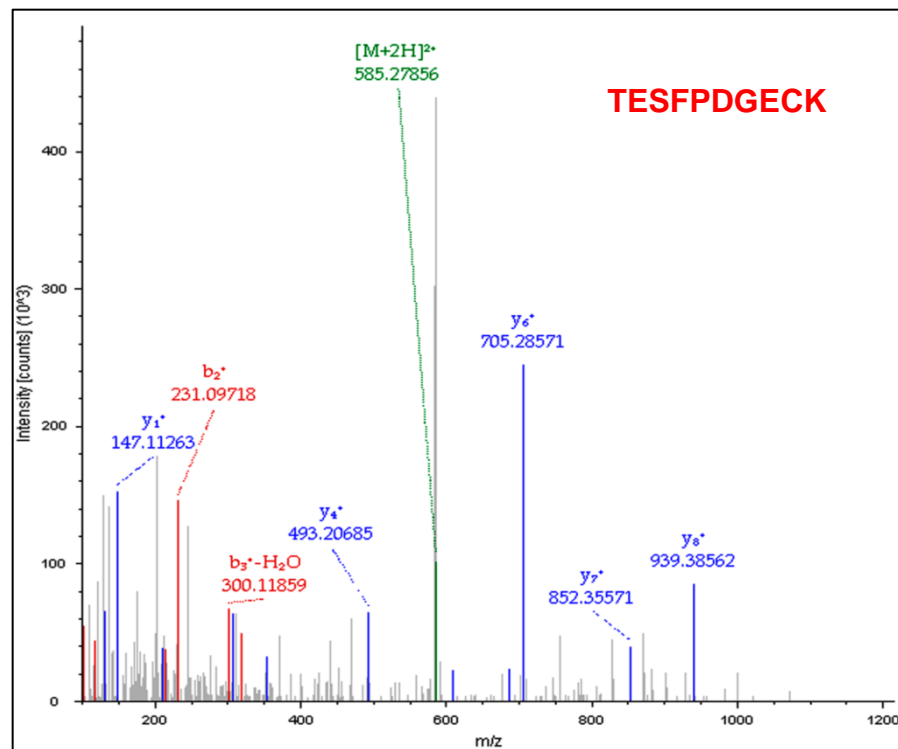

**Supplementary Figure 15. Detection of the CAL1 fragment in xylem sap by Electrospray Ionization Mass Spectrometry (ESI-MS).** Rice seedlings of the *CAL1*-complementation lines N47 were grown for 21 days in hydroponic solution supplemented with 5  $\mu$ M Cd, then xylem sap was sampled for ESI-MS assay. The sequence of the detected *CAL1* fragment was displayed in red at the upper right corner.



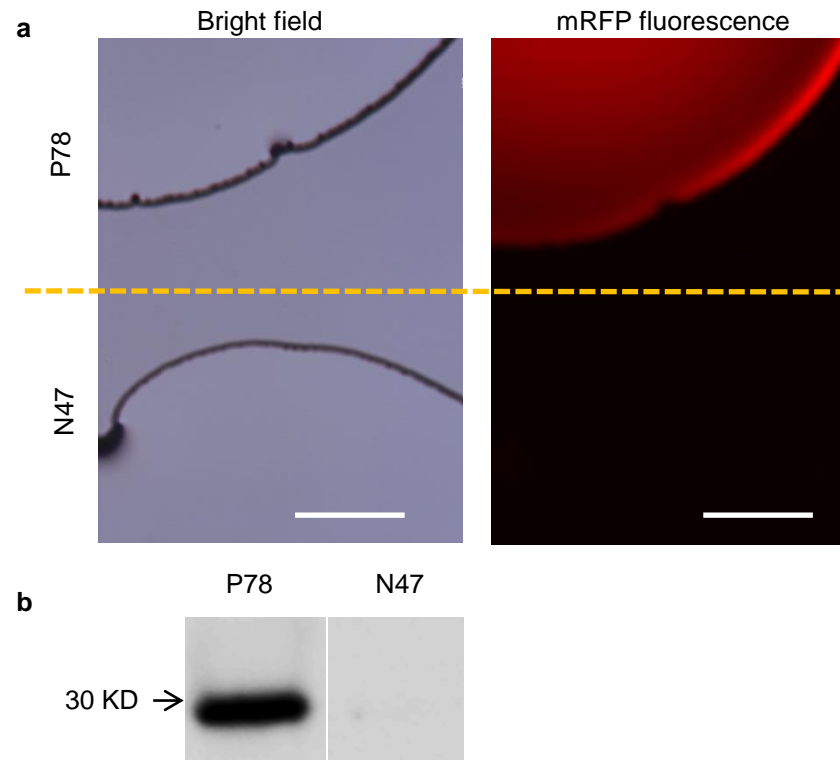

**Supplementary Figure 16. Detection of CAL1 in guttation fluid from intact rice leaves.** Transgenic plants P78 harboring the construct proCAL1<sup>TN1</sup>::CAL1-mRFP, or N47 harboring the complementation construct proCAL1<sup>TN1</sup>::CAL1 were used. Leaf guttation fluid was collected with a micropipette in the morning. Sampled leaf guttation fluid was then subjected to assay of fluorescence imaging (Leica, DM6000B) and Western blotting. **(a)** Fluorescence images of guttation fluid from P78 or N47. Bar = 200  $\mu$ m. **(b)** Western blot detection of CAL1 in guttation fluid from P78 and N47 using anti-RFP antibody.

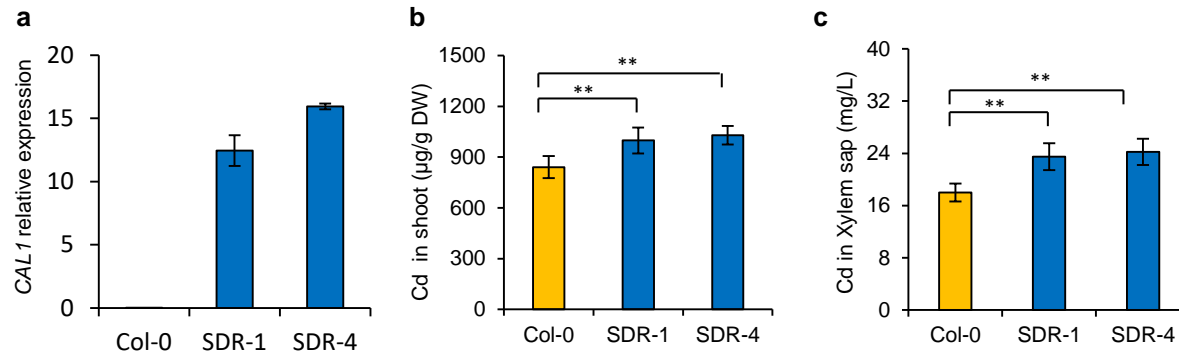

**Supplementary Figure 17. Ectopic expression of *CAL1* increased Cd contents in *Arabidopsis* shoots and xylem sap.** Four weeks old of 35S::*CAL1-mRFP* transgenic plants were exposed to 10 µM Cd for 3 days. Heterologous overexpression of *CAL1* (a) increased Cd contents in *Arabidopsis* shoots (b) and xylem sap (c). *Actin2* was used as an internal control in (a). Data are mean ± SD, n= 3 in (a-c). Significant differences were determined by Student's *t*-test (\*\**P* < 0.01).

**a**

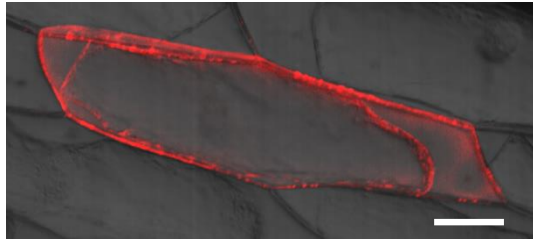

**b**

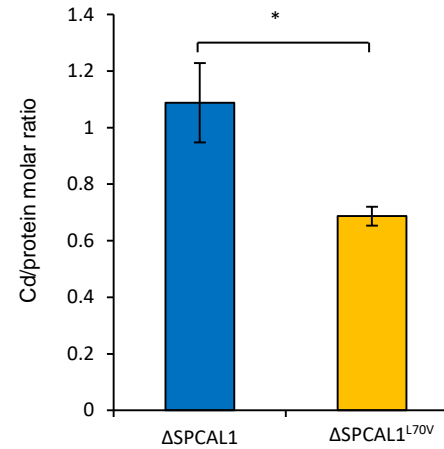

**Supplementary Figure 18. Functional characterization of CAL1<sup>L70V</sup>.** (a) Onion epidermal cells transformed with the 35S::CAL1<sup>L70V</sup>-mRFP construct were incubated in 40% sucrose to induce plasmolysis and then imaged by confocal microscopy. Bar = 20 μm. (b) Different forms of CAL1 recombinant proteins were isolated and incubated with 100 μM Cd at pH = 7.5, as described in Material and Method. Data are mean ± SD, n = 3. Significant differences were determined by Student's *t*-test (\**P* < 0.05).

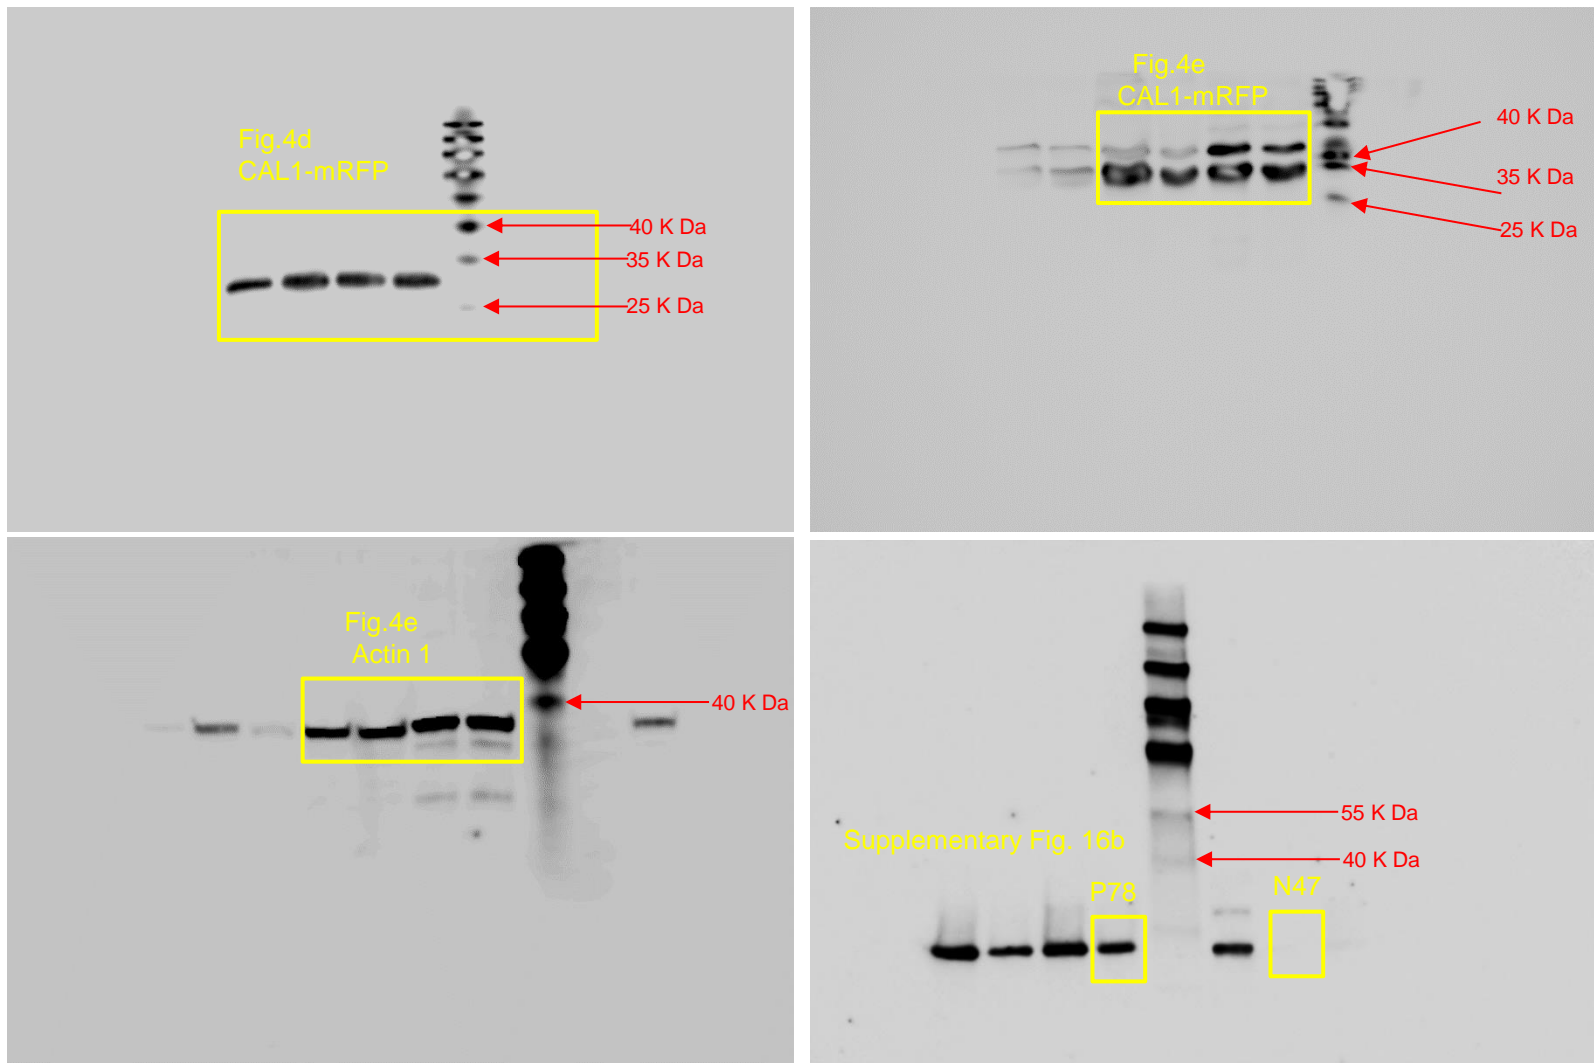

**Supplementary Figure 19 Full uncropped versions of western blot images.** Full uncropped versions of western blot images shown in Fig. 4d-e and Supplementary Fig. 16b. The yellow rectangles indicate the cropped area. The red arrows indicate the molecular markers.

**Supplementary Table 1. Index to the rice accessions used for Iomic screening**

| Serial No. | Accession | Serial No. | Accession | Serial No. | Accession | Serial No. | Accession | Serial No. | Accession | Serial No. | Accession |
|------------|-----------|------------|-----------|------------|-----------|------------|-----------|------------|-----------|------------|-----------|
| 1          | HG2       | 37         | ZL1-1     | 73         | LSZ       | 109        | WZD       | 153        | ZH        | 189        | SY352     |
| 2          | LGT83     | 38         | YLCH      | 74         | TDLD      | 110        | XBN       | 154        | MZ        | 190        | CYPRES    |
| 3          | EJN1      | 39         | SF101     | 75         | TZXX2     | 111        | MBWX      | 155        | LGZ       | 191        | AUS43     |
| 4          | CY1B      | 40         | CDA3      | 76         | DY5       | 112        | QYX       | 156        | SRZ       | 192        | ITA182    |
| 5          | AJNT      | 41         | GJ73      | 77         | YMZG      | 113        | ZG        | 157        | JYZ       | 193        | TN1       |
| 6          | L301B     | 42         | JBL       | 78         | MGZ       | 114        | MWZ       | 158        | ZST       | 194        | CJ06      |
| 7          | GLA4      | 43         | TSN       | 79         | MJD2      | 115        | MMG       | 159        | HGZ       | 195        | YG        |
| 8          | XAZ10     | 44         | GC2       | 80         | AM        | 116        | CGN       | 160        | MDZ       | 196        | SKC1      |
| 9          | JNT43B    | 45         | XGN       | 81         | HBYY      | 117        | ZN        | 161        | SCGJMD    | 197        | HQ0547    |
| 10         | XZX7      | 46         | HK3       | 82         | NTH       | 118        | QK        | 162        | LMD       | 198        | HQ0345    |
| 11         | 80B       | 47         | TZZL1     | 83         | WLX       | 119        | BZN       | 163        | LSD       | 199        | 2S97      |
| 12         | GLA15-    | 48         | TQXH      | 84         | ESN       | 120        | WJHG      | 164        | YQN       | 200        | NIPPO     |
| 13         | ZZB       | 49         | HSGZ      | 85         | JFX       | 121        | NGG       | 165        | NFZ       | 201        | TP309     |
| 14         | BX123B    | 50         | ATG151    | 86         | CSL       | 122        | MWGN      | 166        | QQB       | 202        | ZH11      |
| 15         | HMD       | 51         | XWX3      | 87         | HKZN      | 123        | HL        | 167        | BMZ       | 203        | HD        |
| 16         | BX-7B     | 52         | TZ65      | 88         | NTGJ      | 124        | ZM        | 168        | JXZ       | 204        | CJSD      |
| 17         | JNTB      | 53         | ZSNH6     | 89         | QTBG      | 125        | QTG       | 169        | PA64      | 205        | UN        |
| 18         | FNZP      | 54         | JY1       | 90         | HXLC      | 126        | PWS       | 170        | ZGN       | 206        | LLXBM     |
| 19         | ZS97B     | 55         | CLSJ      | 91         | HMD       | 127        | YZX       | 171        | MGN       | 207        | LLNZ      |
| 20         | GZS97B    | 56         | GHH       | 92         | LHZ       | 128        | GKXN      | 172        | LZN       | 208        | CDJZ      |
| 21         | QSA16B    | 57         | MM        | 93         | BKZH      | 129        | WXN       | 173        | ZJG       | 209        | FHD       |
| 22         | LMB       | 58         | XS115     | 94         | AHC       | 130        | XXM       | 174        | BKSG      | 210        | TDYSX     |
| 23         | IR661-1   | 59         | SBL       | 95         | HMK       | 131        | XBM       | 175        | QSD       | 211        | HSN       |
| 24         | NJ11      | 60         | JD1       | 96         | SB70      | 140        | QXBDD     | 176        | LCH       | 212        | ZJNG      |
| 25         | WG        | 61         | XG        | 97         | SJG       | 141        | LLDBM     | 177        | TQ        | 213        | HMDZ      |
| 26         | G630      | 62         | DDLD      | 98         | LXG       | 142        | TSCXD     | 178        | CMN       | 214        | TGG       |
| 27         | DR409B    | 63         | ZH8       | 99         | XN        | 143        | MZW       | 179        | BG951     | 215        | QKG       |
| 28         | LG287     | 64         | LS1       | 100        | NKN       | 144        | HSB       | 180        | IAC1300   | 216        | BGZ       |
| 29         | HH628     | 65         | BWB1      | 101        | YKN       | 145        | XFLF      | 181        | IRAT10    | 217        | BJG2      |
| 30         | JHB       | 66         | AMK       | 102        | TGW       | 146        | YZL       | 182        | IRAT216   | 218        | YGZ       |
| 31         | 88B       | 67         | DTWX      | 103        | XECT      | 147        | YMTK      | 183        | Kasalath  | 219        | ZG        |
| 32         | G154      | 68         | YD2       | 104        | XD        | 148        | WND       | 184        | 93-11     | 220        | MDZ       |
| 33         | NH21      | 69         | ZD5       | 105        | MHN       | 149        | XHM       | 185        | RBQ       |            |           |
| 34         | XH91269   | 70         | ZX232     | 106        | XHG       | 150        | TTND      | 186        | LEMONT    |            |           |
| 35         | LHMH      | 71         | G87-304   | 107        | ZN4       | 151        | GLW       | 187        | ITA408    |            |           |
| 36         | LCH       | 72         | HW1       | 108        | LHD       | 152        | HTH       | 188        | NK57      |            |           |

**Supplementary Table 2. Quantitative trait loci (QTLs) for Cd accumulation in rice leaf**

| Plant part | QTLs   | Chr | Marker interval | LOD <sup>a</sup> | % of variance explained <sup>b</sup> | Additive effect <sup>c</sup> |
|------------|--------|-----|-----------------|------------------|--------------------------------------|------------------------------|
| leaves     | qLCd2  | 2   | RM324-RM5472    | 2.84             | 13.1%                                | 12.792                       |
|            | qLCd4  | 4   | RM3276-RM225    | 2.15             | 11.2%                                | 10.122                       |
|            | qLCd11 | 11  | RM21-RM3428     | 2.07             | 11.0%                                | -7.8390                      |

Rice seedling were grown in hydroponics as described in Methods, then exposed to 10  $\mu$ M Cd for 7 days before sampling for data collection and QTL analysis. a: Maximum LOD score at the QTL position, b: Percent of phenotypic variance explained by QTL, c: A positive value indicates that the allele from TN1 increases the phenotypic value.

**Supplementary Table 3. Annotation of candidate genes in the QTL region of chromosome 2**

| Locus ID             | Annotation                                          |
|----------------------|-----------------------------------------------------|
| Os02g0628600 (ARF)   | Similar to auxin response factor 8                  |
| Os02g0629200 (MIP)   | Major intrinsic protein (MIP) superfamily           |
| Os02g0630000 (F-box) | F-box domain, cyclin-like domain containing protein |
| Os02g0629800 (CAL1)  | Similar to defensin precursor                       |

**Supplementary Table 4 Cd-binding affinity of  $\Delta$ SPCAL1 and the related mutants assayed by isothermal titration calorimetry**

| Mutants         | Dissociation constant/KD( $\mu$ M) |
|-----------------|------------------------------------|
| $\Delta$ SPCAL1 | 53.7 $\pm$ 4.6                     |
| C55A            | 197.2 $\pm$ 15.7 **                |
| C65A            | 204.1 $\pm$ 21.3 **                |
| C75A            | 96 $\pm$ 8.5 *                     |

The wild type  $\Delta$ SPCAL1 and the three variants with significantly decreased Cd binding ability (Supplementary Figure 11b) were used for ITC analysis, at pH 7.5. Data are mean  $\pm$  SD, n= 3. Significant differences were determined by Student's *t*-test (\**P* < 0.05 \*\**P* < 0.01).



**Supplementary Table 5. Primers used in this study**

| Primer                                  | Forward primer             | Reverse primer             |
|-----------------------------------------|----------------------------|----------------------------|
| <b>Map based cloning of CAL1 primer</b> |                            |                            |
| RM324                                   | CTGATTCCACACACTTGTGC       | GATTCCACGTCAGGATCTTC       |
| B3                                      | GGAGAGTGAGAGCCAAATGA       | GCCTTAATAGTCGGCTTAGC       |
| EcoR1                                   | TGAGTCATATTCAGTCAACC       | ACAGCAAGATCGTGGTATTA       |
| RM13628                                 | TATGCCACGAATGACCCTAACC     | CTCCATATGCAGCGACAATCG      |
| X3                                      | CAGCTGACCTAACTACGCCC       | GCCAAGGATTCTTCTGTGCA       |
| C1                                      | GGTGAGTCTAGGCCAATATG       | AGAGAACCAAGAGGGATTGC       |
| C2                                      | GAGCAGGTACAATAGCAGAC       | AGACAAGCATGCAGAAAAGTA      |
| D1                                      | ATGTGGGCCCCGCTATTTTA       | GTAAGCACACAGATTCATCA       |
| F1                                      | GAGACGTCTCCGACAACACC       | CAGCATTTAGCGCCTAGTTG       |
| H10                                     | ACCACGCATCAGTTGCACGC       | CGGGTCTCACGCAATTGTTC       |
| M6                                      | GTAATGGTTTAATGCAATGC       | ACTGAGGTGGTCAATGAGTT       |
| H21                                     | AGTACTTGTACTTGCAAAGG       | TATATGTTTGCTAACGATCG       |
| RM13652                                 | TTAAGTTTCGGCTCCTTCACTCG    | CACACATATGCATCCACAGTTCC    |
| E6                                      | CTGTCCGTGCACGACGTATT       | GAGGTGGATTTGGAAGTGTG       |
| Nhe1                                    | GACATCACAGACGCGGCAAT       | GCTTTTCCCAATTTGACGT        |
| RM263                                   | CCCAGGCTAGCTCATGAACC       | GCTACGTTTGAGCTACCACG       |
| <b>Real Time PCR</b>                    |                            |                            |
| CAL1                                    | AGTCGCGTGTTCTCCTTTGT       | CATGACAGCAGCTTGCAAT        |
| HistonH3                                | GGTCAACTTGTTGATTCCCCTCT    | AACCGCAAAATCCAAAGAACG      |
| Actin 1                                 | TCCATCTTGGCATCTCTCAG       | GTACCCGCATCAGGCATCTG       |
| ARF                                     | CCATCAACCTCTCGTCTTTCTC     | GTGGTTGTGATGGTAATGGTG      |
| MIP                                     | CTGTCCAGCACTAGATCAACG      | TGGCGGACATAGTTCAAAGG       |
| F-box                                   | TTCCGCTACGCTTGGTTC         | ACAAAAGTGAAGTTGTTACACGG    |
| Actin 2                                 | AGGTATCGCTGACCGTATGAG      | CATCTGCTGGAATGTGCTGA       |
| <b>Transgenic plant</b>                 |                            |                            |
| ProCAL1                                 | AAGCTTCCCATGTGGGCCCCGCTATT | GGATCCCTGTACCGGCGACTCGAACT |
| sgR-CAL1                                | TGGCGGGGACGACCAAGGTGGCGG   | AAACCCGCCACCTTGGTCGTCCCC   |
| HB-CAL1                                 | AAGCTTATGTGGGCCCCGCTATTTTA | GAGCTCGTAAGCACACAGATTCATCA |
| HB-F-box                                | AAGCTTGAGACGTCTCCGACAACACC | GAGCTCCAGCATTTAGCGCCTAGTTG |
| HB-ARF                                  | AAGCTTGGTGAGTCTAGGCCAATATG | GGTACCAGAGAACCAAGAGGGATTGC |
| HB-MIP                                  | GGATCCGATGACAAGATGAAGGACCT | TCTAGACTCCACAGACAAGCATGCAG |
| <b>CAL1 subcellular localization</b>    |                            |                            |
| 5'CAL1-RFP                              | GGATCCATGGCTCCGTCTCGTCGCAT | ACTAGTGCAGACCTTCTTGCAGAAGC |
| 3'CAL1-RFP                              | TCTAGAATGGCTCCGTCTCGTCGCAT | GGATCCCTAGCAGACCTTCTTGCAGA |
| RFP                                     | ACTAGTATGGCCTCCTCCGAGGACGT | GAGCTCTTAGGCGCCGGTGGAGTGGC |
| <b>Prokaryotic expression of CAL1</b>   |                            |                            |
| ΔSPCAL1                                 | GGATCCAGGCACTGCCTGTGCGAGAG | GAATTCCTAGCAGACCTTCTTGCAGA |
| TF-CAL1                                 | GGATCCATGGCTCCGTCTCGTCGCAT | GAATTCCTAGCAGACCTTCTTGCAGA |
| <b>Transgenic plants screening</b>      |                            |                            |
| HYG                                     | CTTCTGCGGGCGAATTTGTGT      | TTATCGGCACTTTGCATCGG       |

**Supplementary Table 5 continued**

| Primer                    | Forward primer                  | Reverse primer                  |
|---------------------------|---------------------------------|---------------------------------|
| Site-specific mutagenesis |                                 |                                 |
| C34A                      | GGATCCAGGCACGCCCTGTCGCAGAGCCAC  | GGCGTGCCTGGATCCCTCGAGGGTACCGAG  |
| C45A                      | TTCAAGGGCATGGCCGTGAGCAGCAACAAC  | GGCCATGCCCTTGAACCTGTGGCTCTGCGA  |
| C51A                      | AGCAGCAACAACGCCGCCAACGTGTGCAGG  | GGCGTTGTTGCTGCTCACGCACATGCCCTT  |
| C55A                      | TGCGCCAACGTGGCCAGGACGGAGAGCTTC  | GGCCACGTTGGCGCAGTTGTTGCTGCTCAC  |
| C65A                      | CCCGACGGCGAGGCCAAGTCGCACGGCCTC  | GGCCTCGCCGTCGGGGAAGCTCTCCGTCCT  |
| C75A                      | CTCGAGCGCAAGGCCTTCTGCAAGAAGGTC  | GGCCTTGCGCTCGAGGCCGTGCGACTTGCA  |
| C76A                      | CGCAAGTGCTTCGCCAAGAAGGTCTGCTAG  | GGCGAAGCACTTGCGCTCGAGGCCGTGCGA  |
| C80A                      | TGCAAGAAGGTCGCCTAGGAATTC AAGCTT | GGCGACCTTCTTG CAGAAGCACTTGCGCTC |
